# Supplementary figures and images for: Organic–inorganic hybrids of imidazole complexes of palladium(ii), copper(ii) and zinc(ii). Crystals and liquid crystals
Source: Royal Society of Chemistry journal article supplement (doi:10.1039/b308648h), 2003-01-01

ESI Figure 1

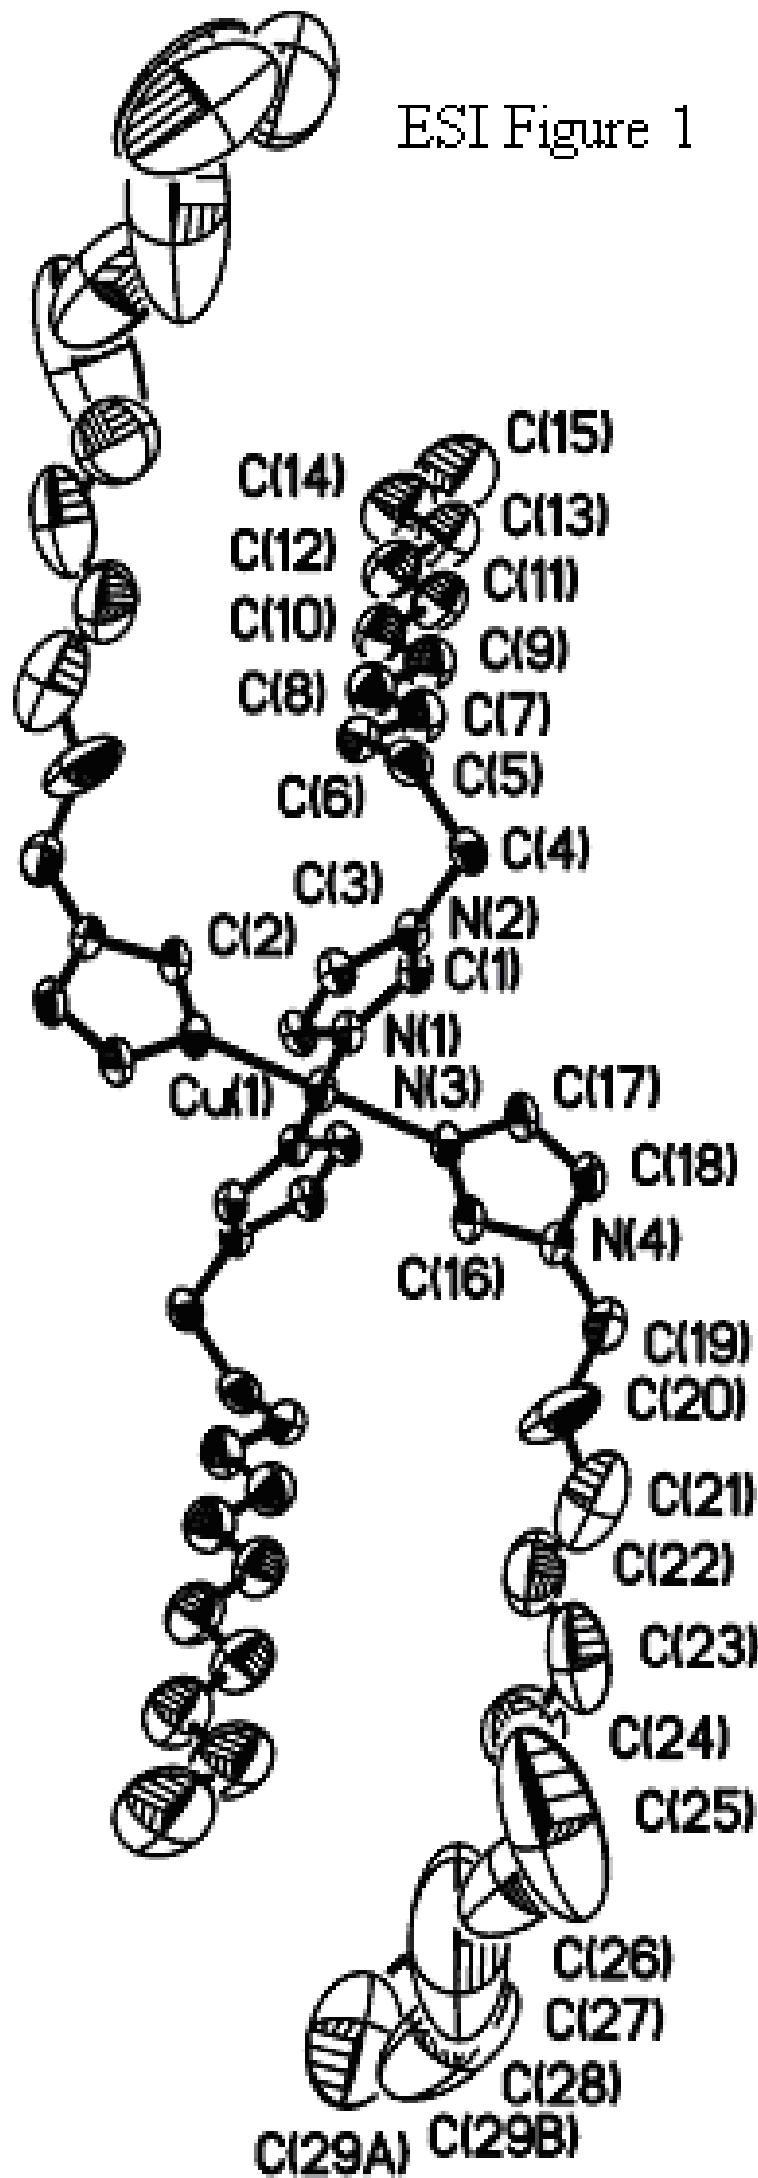

Supplement: b308648h1.pdf [file b308648h1.pdf]

ESI Figure 2

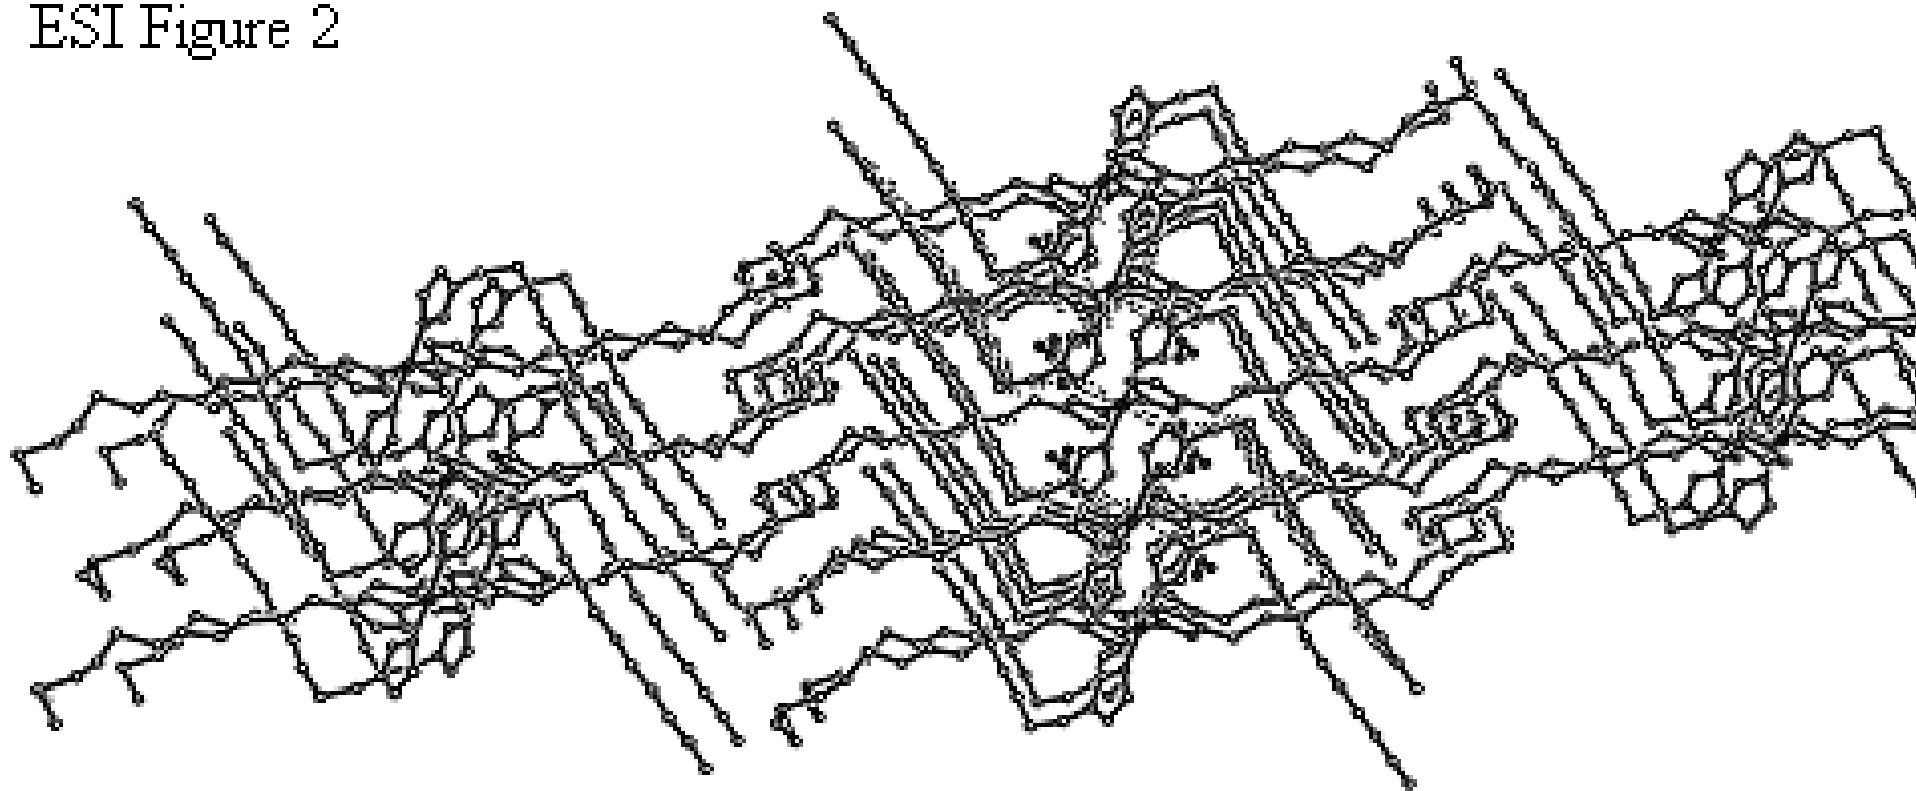

Supplement: b308648h2.pdf [file b308648h2.pdf]
